# Supplementary material for: Comparative Mitogenomics Reveals Cryptic Species in Sillago ingenuua McKay, 1985 (Perciformes: Sillaginidae)
Source: MDPI journal article supplement (doi:10.3390/genes14112043), 2023-11-04

**Table S1.** Nucleotide composition and skews for mitochondrial 13 PCGs, tRNA, rRNA and control region (CR) in the genus *Sillago*.

| Species                     | T (%) | C (%) | A (%) | G (%) | AT - skew | GC - skew | Species                   | T (%) | C (%) | A (%) | G (%) | AT - skew | GC - skew |
|-----------------------------|-------|-------|-------|-------|-----------|-----------|---------------------------|-------|-------|-------|-------|-----------|-----------|
| <b><i>S. ingenuua</i> A</b> | 26.1  | 29.2  | 28.4  | 16.3  | 0.041     | -0.284    | <b><i>S. indica</i></b>   | 27.3  | 29.0  | 25.5  | 18.1  | -0.033    | -0.231    |
| PCGs                        | 28.3  | 30.3  | 25.8  | 15.7  | -0.045    | -0.318    | PCGs                      | 29.6  | 30.1  | 22.6  | 17.8  | -0.133    | -0.256    |
| tRNA                        | 26.8  | 21.4  | 26.8  | 25.0  | 0.001     | 0.079     | tRNA                      | 26.7  | 21.6  | 26.8  | 24.8  | 0.002     | 0.069     |
| rRNA                        | 21.3  | 25.5  | 32.4  | 20.8  | 0.206     | -0.101    | rRNA                      | 21.7  | 25.8  | 30.5  | 22.0  | 0.169     | -0.080    |
| CR                          | 32.7  | 18.8  | 32.7  | 15.8  | 0.000     | -0.088    | CR                        | 30.3  | 22.4  | 30.9  | 16.5  | 0.010     | -0.151    |
| <b><i>S. ingenuua</i> B</b> | 25.9  | 29.3  | 28.5  | 16.4  | 0.048     | -0.282    | <b><i>S. japonica</i></b> | 27.5  | 27.9  | 26.4  | 18.3  | -0.021    | -0.208    |
| PCGs                        | 28.1  | 30.3  | 26.0  | 15.7  | -0.038    | -0.317    | PCGs                      | 30.0  | 29.0  | 23.2  | 17.8  | -0.127    | -0.239    |
| tRNA                        | 26.7  | 21.4  | 27.0  | 25.0  | 0.005     | 0.078     | tRNA                      | 26.4  | 21.6  | 27.5  | 24.4  | 0.020     | 0.060     |
| rRNA                        | 21.1  | 25.6  | 32.2  | 21.2  | 0.208     | -0.094    | rRNA                      | 21.9  | 24.4  | 31.3  | 22.4  | 0.177     | -0.044    |
| CR                          | 30.6  | 20.3  | 33.4  | 15.6  | 0.044     | -0.131    | CR                        | 29.1  | 22.2  | 33.2  | 15.4  | 0.066     | -0.179    |
| <b><i>S. aeolus</i></b>     | 26.0  | 29.7  | 25.5  | 18.8  | -0.009    | -0.226    | <b><i>S. sihama</i></b>   | 26.5  | 29.3  | 25.8  | 18.3  | -0.012    | -0.230    |
| PCGs                        | 28.1  | 30.9  | 22.6  | 18.4  | -0.107    | -0.254    | PCGs                      | 28.8  | 30.4  | 22.7  | 18.0  | -0.118    | -0.256    |
| tRNA                        | 26.8  | 21.6  | 26.6  | 25.1  | -0.004    | 0.076     | tRNA                      | 26.5  | 21.8  | 27.0  | 24.8  | 0.010     | 0.065     |
| rRNA                        | 20.7  | 26.2  | 30.8  | 22.3  | 0.196     | -0.081    | rRNA                      | 20.8  | 26.4  | 30.2  | 22.5  | 0.183     | -0.080    |
| CR                          | 28.8  | 23.5  | 30.4  | 17.3  | 0.026     | -0.154    | CR                        | 27.7  | 23.2  | 32.8  | 16.3  | 0.085     | -0.175    |
| <b><i>S. asiatica</i></b>   | 26.6  | 29.4  | 25.4  | 18.7  | -0.023    | -0.222    | <b><i>S. sinica</i></b>   | 26.1  | 28.9  | 25.2  | 19.7  | -0.018    | -0.190    |
| PCGs                        | 28.8  | 30.4  | 22.3  | 18.5  | -0.126    | -0.244    | PCGs                      | 28.0  | 30.0  | 22.5  | 19.4  | -0.109    | -0.215    |
| tRNA                        | 26.5  | 22.2  | 27.3  | 24.1  | 0.016     | 0.042     | tRNA                      | 26.7  | 21.6  | 26.8  | 24.8  | 0.002     | 0.069     |
| rRNA                        | 20.9  | 25.9  | 31.0  | 22.2  | 0.195     | -0.075    | rRNA                      | 21.9  | 24.8  | 30.2  | 23.1  | 0.159     | -0.037    |
| CR                          | 29.7  | 23.2  | 30.0  | 17.0  | 0.004     | -0.153    | CR                        | 28.4  | 22.7  | 29.8  | 19.0  | 0.025     | -0.089    |

**Figure S1.** Inferred secondary structures for the 22 tRNA genes of *Sillago ingenuua* (tRNA genes of *S. ingenuua* A were showed and mutation sites of *S. ingenuua* B were marked).

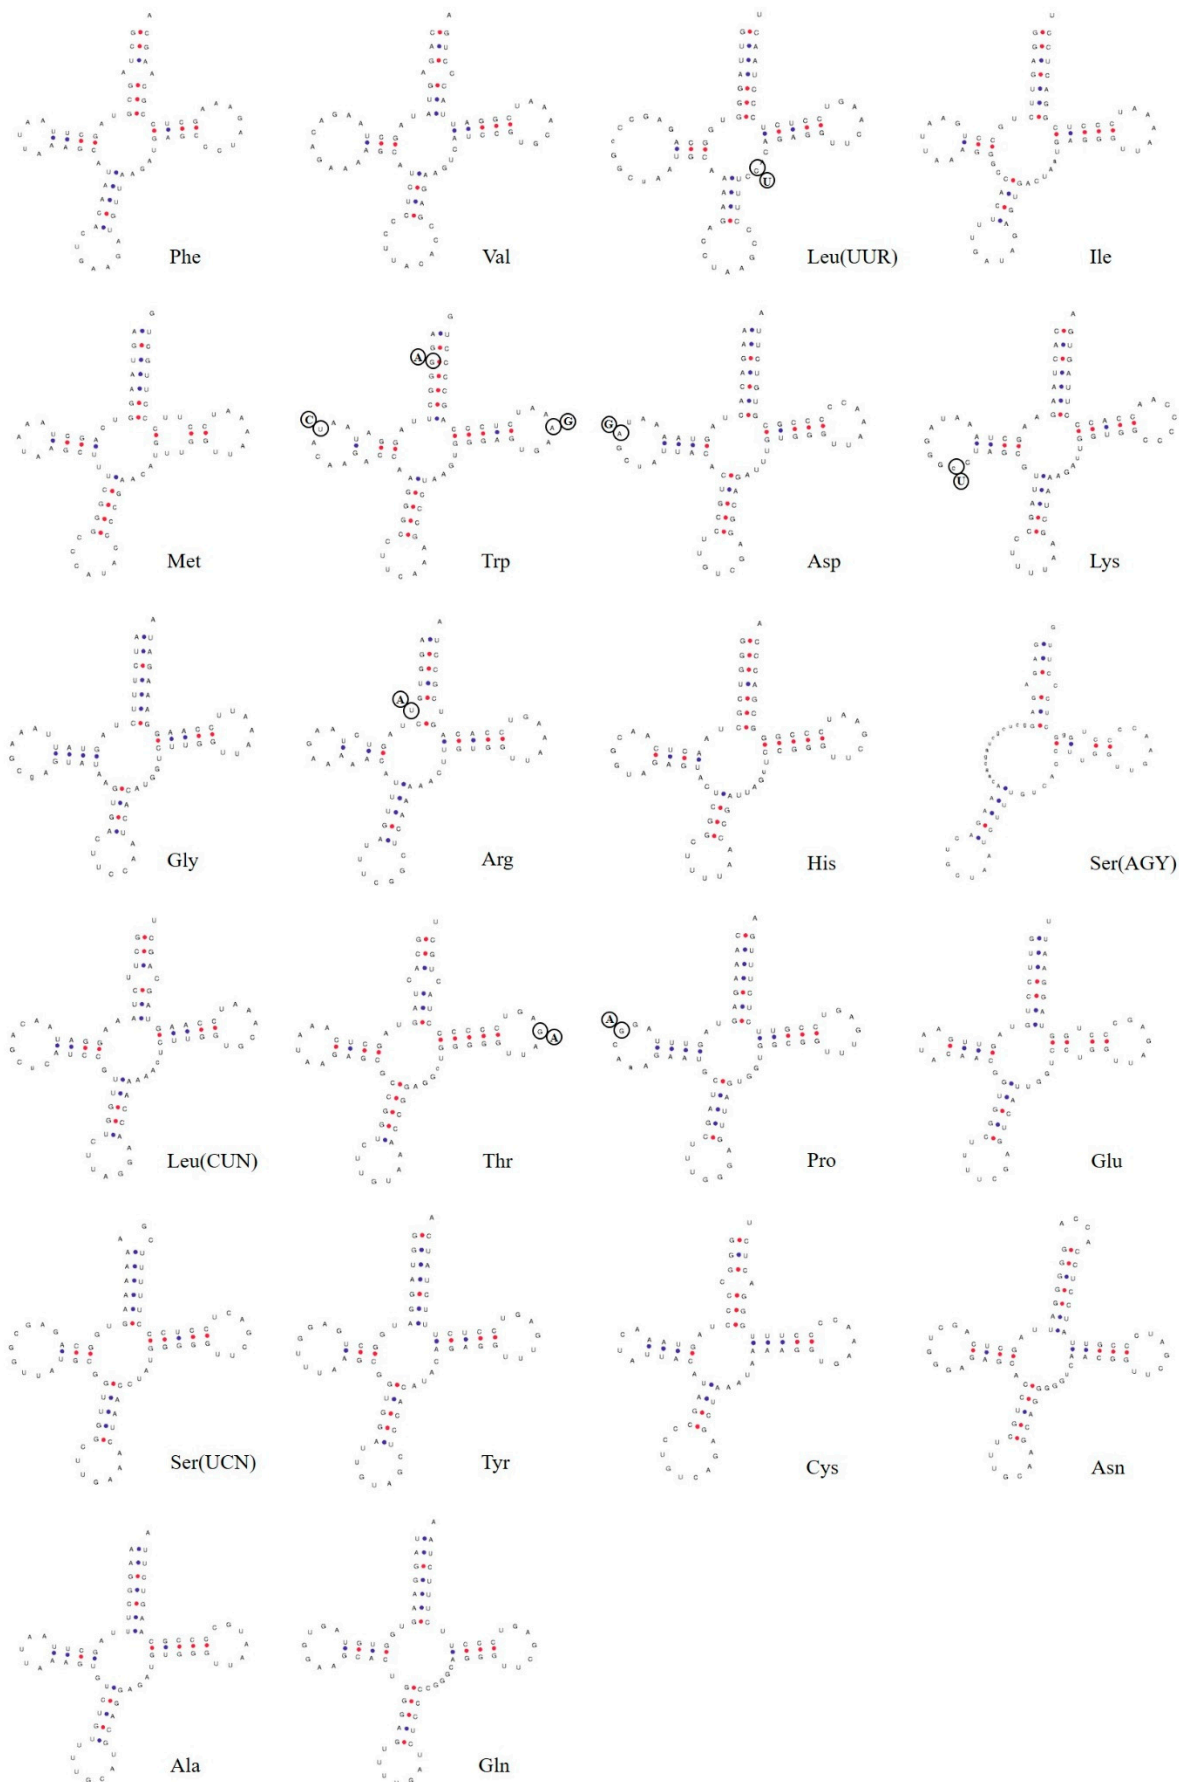

Supplement: s1 [file s1]
